# Supplementary material for: The Potent and Selective Histamine H3 Receptor Antagonist E169 Counteracts Cognitive Deficits and Mitigates Disturbances in the PI3K/AKT/GSK-3β Signaling Pathway in MK801-Induced Amnesia in Mice
Source: MDPI journal article supplement (doi:10.3390/ijms241612719), 2023-08-12
Supplement: s1 [file s1]

## Supplementary data

**Table S1.** Physicochemical properties of **E169** calculated by server SwissADME [<http://www.swissadme.ch/>] (Last accessed on 4 January 2023)].

| MW <sup>a</sup> | NHA <sup>b</sup> | TPSA <sup>c</sup> | NRotB <sup>d</sup> | NHBA <sup>e</sup> | NHBD <sup>f</sup> | Log Pcon <sup>g</sup> |
|-----------------|------------------|-------------------|--------------------|-------------------|-------------------|-----------------------|
| 325             | 24               | 12.47             | 8                  | 2                 | 0                 | 5.21                  |

<sup>a</sup>MW = molecular weight; <sup>b</sup>NHA = number of heavy atoms; <sup>c</sup>TPSA = topological polar surface area; <sup>d</sup>number of rotatable bonds; <sup>e</sup>NHBA = number of hydrogen bond acceptors; <sup>f</sup>NHBD = number of hydrogen bond donors; <sup>g</sup>log Pcon = consensus lipophilicity

**Table S2.** Drug-likeness properties of **E169** calculated by server SwissADME [<http://www.swissadme.ch/>] (Last accessed on 4 January 2023)].

| Lipinski       | Ghose | Veber | Egan | Muegge         | PAINS |
|----------------|-------|-------|------|----------------|-------|
| Y <sup>a</sup> | Y     | Y     | Y    | N <sup>b</sup> | N     |

<sup>a</sup>Y= yes; <sup>b</sup>N = No

**Table S3.** Pharmacokinetic properties of **E169** calculated by server SwissADME [<http://www.swissadme.ch/>] (Last accessed on 4 January 2023)] and pkCSM [[http://tox.charite.de/prottox\\_II/](http://tox.charite.de/prottox_II/)] (Last accessed on 4 January 2023)].

| server    | BBB            | GI | Substrate       |        | Inhibitor |                |        |        |        |
|-----------|----------------|----|-----------------|--------|-----------|----------------|--------|--------|--------|
|           |                |    | CYP2D6          | CYP3A4 | CYP1A2    | CYP2C19        | CYP2C9 | CYP2D6 | CYP3A4 |
| SwissADME | Y <sup>a</sup> | Y  | -- <sup>b</sup> | --     | Y         | N <sup>c</sup> | N      | Y      | N      |
| pkSCM     | Y              | Y  | N               | Y      | Y         | N              | N      | Y      | N      |

<sup>a</sup>Y= yes; <sup>b</sup>-- = not predict <sup>c</sup>N = No

**Table S4.** Toxicity properties of **E169** calculated by server pkCSM [[http://tox.charite.de/prottox\\_II/](http://tox.charite.de/prottox_II/)] (Last accessed on 4 January 2023)].

| toxicity    | AMES test      | hERG I inhibitor | hERG I inhibitor | hepatotoxicity |
|-------------|----------------|------------------|------------------|----------------|
| <b>E169</b> | Y <sup>a</sup> | N <sup>b</sup>   | Y                | N              |

<sup>a</sup>Y= yes; <sup>b</sup>N = No

**Table S5.** Toxicity properties of **E169** calculated by server ProToxII [<https://biosig.lab.uq.edu.au/pkcsml>] (Last accessed on 4 January 2023)].

| class of toxicity | predicted value of toxic dose LD <sub>50</sub> [mg/kg] | predicted kind of toxicity |
|-------------------|--------------------------------------------------------|----------------------------|
| III <sup>a</sup>  | 178                                                    | immunotoxicity             |

<sup>a</sup> Class III: harmful if swallowed (50 < LD<sub>50</sub> ≤ 300)

**Table S6.** Metabolism of **E169** predicted by server Biotransformer [<https://biotransformer.ca/new> (Last accessed on 4 January 2023)]. Phase I transformation.

| Results ID | Predicted results                                                                   | Smiles                                                          | Chemical formula                                | Isotope mass [Da] | Reaction type                                       | Reaction info                                   | Biotransformation reaction                                                            |
|------------|-------------------------------------------------------------------------------------|-----------------------------------------------------------------|-------------------------------------------------|-------------------|-----------------------------------------------------|-------------------------------------------------|---------------------------------------------------------------------------------------|
| 1          | 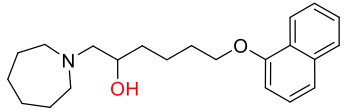   | <chem>OC(CCCCOC1=CC=CC2=CC=CC=C12)CN3CCCCCCC3</chem>            | C <sub>22</sub> H <sub>31</sub> NO <sub>2</sub> | 341,2354          | Hydroxylation of acyclic aliphatic secondary carbon | Enzyme: cytochrome P450 1A2<br>Biosystem: HUMAN |    |
| 2          |    | <chem>OC(CCCOC1=CC=CC2=CC=CC=C12)CCN3CCCCCCC3</chem>            | C <sub>22</sub> H <sub>31</sub> NO <sub>2</sub> | 341,2354          | Hydroxylation of acyclic aliphatic secondary carbon | Enzyme: cytochrome P450 1A2<br>Biosystem: HUMAN |    |
| 3          |    | <chem>OC(CCOC1=CC=CC2=CC=CC=C12)=CC=CC=C12)CCCN3CCCCCCC3</chem> | C <sub>22</sub> H <sub>31</sub> NO <sub>2</sub> | 341,2354          | Hydroxylation of acyclic aliphatic secondary carbon | Enzyme: cytochrome P450 1A2<br>Biosystem: HUMAN |    |
| 4          |  | <chem>OC(COC1=CC=CC2=CC=CC=C12)CCCCN3CCCCCCC3</chem>            | C <sub>22</sub> H <sub>31</sub> NO <sub>2</sub> | 341,2354          | Hydroxylation of acyclic aliphatic secondary carbon | Enzyme: cytochrome P450 1A2<br>Biosystem: HUMAN |  |

|   |  |                                                                      |                        |          |                                                       |                                                          |  |
|---|--|----------------------------------------------------------------------|------------------------|----------|-------------------------------------------------------|----------------------------------------------------------|--|
| 5 |  | <chem>OC(C=CC1=CC=CC=C21)=C2O</chem><br><chem>CCCCCN3CCCCCCC3</chem> | <chem>C22H31NO2</chem> | 341,2354 | Aromatic<br>Hydroxylation<br>of fused<br>benzene ring | Enzyme:<br>cytochrome<br>P450 1A2<br>Biosystem:<br>HUMAN |  |
| 6 |  | <chem>OC1=CC2=CC=CC=C2C</chem><br><chem>(OCCCCCN3CCCCCCC3)=C1</chem> | <chem>C22H31NO2</chem> | 341,2354 | Aromatic<br>Hydroxylation<br>of fused<br>benzene ring | Enzyme:<br>cytochrome<br>P450 1A2<br>Biosystem:<br>HUMAN |  |
| 7 |  | <chem>OC1=CC=C2C(OCCCCCN3CCCCCCC3)=CC=CC2=C1</chem>                  | <chem>C22H31NO2</chem> | 341,2354 | Aromatic<br>Hydroxylation<br>of fused<br>benzene ring | Enzyme:<br>cytochrome<br>P450 1A2<br>Biosystem:<br>HUMAN |  |
| 8 |  | <chem>OC1=CC=C2C=CC=C(C2=C1)</chem><br><chem>OCCCCCN3CCCCCCC3</chem> | <chem>C22H31NO2</chem> | 341,2354 | Aromatic<br>Hydroxylation<br>of fused<br>benzene ring | Enzyme:<br>cytochrome<br>P450 1A2<br>Biosystem:<br>HUMAN |  |
| 9 |  | <chem>[o]=CCCCCN1CCCCCCC1</chem>                                     | <chem>C12H23NO</chem>  | 197,1779 | O-Dealkylation                                        | Enzyme:<br>cytochrome<br>P450 1A2<br>Biosystem:<br>HUMAN |  |

|    |                                                                                     |                                                          |                                                 |          |                                                            |                                                          |                                                                                       |
|----|-------------------------------------------------------------------------------------|----------------------------------------------------------|-------------------------------------------------|----------|------------------------------------------------------------|----------------------------------------------------------|---------------------------------------------------------------------------------------|
| 10 | 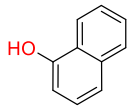   | <chem>OC1=CC=CC2=CC=CC=C12</chem>                        | C <sub>10</sub> H <sub>8</sub> O                | 144.0575 | O-Dealkylation                                             | Enzyme:<br>cytochrome<br>P450 1A2<br>Biosystem:<br>HUMAN |    |
| 11 |    | <chem>[O-][N+]1(CCCCCC1)CCCCCOC2=CC=CC3=CC=CC=C23</chem> | C <sub>22</sub> H <sub>31</sub> NO <sub>2</sub> | 341.2354 | N-Oxidation of<br>alicyclic tertiary<br>amine              | Enzyme:<br>cytochrome<br>P450 1A2<br>Biosystem:<br>HUMAN |    |
| 12 |    | <chem>N1CCCCC1</chem>                                    | C <sub>6</sub> H <sub>13</sub> N                | 99.10479 | N-Dealkylation<br>of alicyclic<br>tertiary amine           | Enzyme:<br>cytochrome<br>P450 1A2<br>Biosystem:<br>HUMAN |    |
| 13 |    | <chem>O=CCCCCOC1=CC=CC2=CC=CC=C12</chem>                 | C <sub>16</sub> H <sub>18</sub> O <sub>2</sub>  | 242.1306 | N-Dealkylation<br>of alicyclic<br>tertiary amine           | Enzyme:<br>cytochrome<br>P450 1A2<br>Biosystem:<br>HUMAN |    |
| 14 |  | <chem>OC1N(CCCCC1)CCCCCOC2=CC=CC3=CC=CC=C23</chem>       | C <sub>22</sub> H <sub>31</sub> NO <sub>2</sub> | 341.2354 | Hydroxylation<br>of heteroalicyclic<br>secondary<br>carbon | Enzyme:<br>cytochrome<br>P450 1A2<br>Biosystem:<br>HUMAN |  |

|    |                                                                                     |                                                           |           |           |                                                   |                                                 |                                                                                       |
|----|-------------------------------------------------------------------------------------|-----------------------------------------------------------|-----------|-----------|---------------------------------------------------|-------------------------------------------------|---------------------------------------------------------------------------------------|
| 15 | 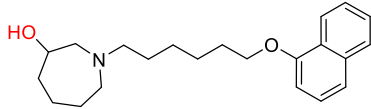   | <chem>OC1CN(CCCC1)CCCCCOC2=CC=CC3=CC=CC=C23</chem>        | C22H31NO2 | 341.2354  | Hydroxylation of heteroalicyclic secondary carbon | Enzyme: cytochrome P450 1A2<br>Biosystem: HUMAN |    |
| 16 |    | <chem>OC1=C2C(OCCCCCN3CCCCC3)=CC=CC2=CC=C1</chem>         | C22H31NO2 | 341,23548 | Aromatic Hydroxylation of fused benzene ring      | Enzyme: cytochrome P450 1A2<br>Biosystem: HUMAN |    |
| 17 |    | <chem>OC1=C2C=CC=C(C2=CC=C1)OCCCCCN3CCCCC3</chem>         | C22H31NO2 | 341,23548 | Aromatic Hydroxylation of fused benzene ring      | Enzyme: cytochrome P450 1A2<br>Biosystem: HUMAN |    |
| 18 |   | <chem>N1(CCCCCC1)CCCCCOC2=CC([O]3)C3C4=CC=CC=C24</chem>   | C22H31NO2 | 341.2354  | Epoxidation of arene                              | Enzyme: cytochrome P450 1A2<br>Biosystem: HUMAN |    |
| 19 |  | <chem>N1(CCCCCC1)CCCCCOC2=CC=CC3=C(O4)C4=CC=CC=C23</chem> | C22H29NO2 | 339.2198  | Epoxidation of arene                              | Enzyme: cytochrome P450 1A2<br>Biosystem: HUMAN |  |

|    |  |                                                        |                        |           |                                                                          |                                                 |  |
|----|--|--------------------------------------------------------|------------------------|-----------|--------------------------------------------------------------------------|-------------------------------------------------|--|
| 20 |  | <chem>N1(CCCCCC1)CCCCCOC2=CC=CC3=CC=C(O4)C4=C23</chem> | <chem>C22H29NO2</chem> | 339.2198  | Epoxidation of arene                                                     | Enzyme: cytochrome P450 1A2<br>Biosystem: HUMAN |  |
| 21 |  | <chem>OC(CCCCCOC1=CC=CC2=CC=CC=C12)N3CCCCCCC3</chem>   | <chem>C22H31NO2</chem> | 341.2354  | Aliphatic Hydroxylation of carbon alpha to secondary or tertiary alkyl-N | Enzyme: cytochrome P450 2B6<br>Biosystem: HUMAN |  |
| 22 |  | <chem>OC1N(CCCCC1)CCCCCOC2=CC=CC3=CC=CC=C23</chem>     | <chem>C22H31NO2</chem> | 341.2354  | Aliphatic Hydroxylation of carbon alpha to secondary or tertiary alkyl-N | Enzyme: cytochrome P450 2B6<br>Biosystem: HUMAN |  |
| 23 |  | <chem>OC1=CC=C(C2=CC=CC=C12)OCCCCCN3CCCCCCC3</chem>    | <chem>C22H31NO2</chem> | 341,23548 | Aromatic Hydroxylation of fused benzene ring                             | Enzyme: cytochrome P450 2D6<br>Biosystem: HUMAN |  |
